# Supplementary material for: Hospital Volume and 30-Day Mortality for Three Common Medical Conditions
Source: Atypon-hosted journal article supplement (doi:10.1056/nejmsa0907130), 2010-03-24
Supplement: nejm_ross_1110sa1.pdf [file nejm_ross_1110sa1.pdf]

## Supplementary Appendix

This appendix has been provided by the authors to give readers additional information about their work.

Supplement to: Ross JS, Normand S-LT, Wang Y, et al. Hospital volume and 30-day mortality for three common medical conditions. *N Engl J Med* 2010;362:1110-8.

**Online Supplement Table 1:** International Classification of Diseases, Ninth Revision, Clinical Modification (ICD-9-CM) diagnostic codes used to identify patients who were hospitalized for acute myocardial infarction, heart failure, and pneumonia.

| Acute Myocardial Infarction |                                                                                 | Heart Failure |                                                                   | Pneumonia |                                                                                  |
|-----------------------------|---------------------------------------------------------------------------------|---------------|-------------------------------------------------------------------|-----------|----------------------------------------------------------------------------------|
| ICD-9-CM                    | Description                                                                     | ICD-9-CM      | Description                                                       | ICD-9-CM  | Description                                                                      |
| 410.00                      | Acute Myocardial Infarction (anterolateral wall) – episode of care unspecified  | 402.01        | Malignant hypertensive heart disease with heart failure           | 480.3     | Pneumonia due to Severe Acute Respiratory Syndrome (SARS)-associated coronavirus |
| 410.01                      | Acute Myocardial Infarction (anterolateral wall) – initial episode of care      | 402.11        | Benign hypertensive heart disease with heart failure              | 480.8     | Viral pneumonia: pneumonia due to other virus not elsewhere classified           |
| 410.10                      | Acute Myocardial Infarction (other anterior wall) – episode of care unspecified | 402.91        | Hypertensive heart disease with heart failure                     | 480.9     | Viral pneumonia: viral pneumonia, unspecified                                    |
| 410.11                      | Acute Myocardial Infarction (other anterior wall) – initial episode of care     | 404.01        | Malignant hypertensive heart and renal disease with heart failure | 481       | Pneumococcal pneumonia (Streptococcus pneumoniae pneumonia)                      |
| 410.20                      | Acute Myocardial Infarction                                                     | 404.03        | Malignant hypertensive heart                                      | 482.0     | Other bacterial pneumonia:                                                       |

|        |                                                                                  |        |                                                                                  |        |                                                                                   |
|--------|----------------------------------------------------------------------------------|--------|----------------------------------------------------------------------------------|--------|-----------------------------------------------------------------------------------|
|        | (inferolateral wall) – episode of care unspecified                               |        | and renal disease with heart failure and renal failure                           |        | pneumonia due to Klebsiella pneumoniae                                            |
| 410.21 | Acute Myocardial Infarction (inferolateral wall) – initial episode of care       | 404.11 | Benign hypertensive heart and renal disease with heart failure                   | 482.1  | Other bacterial pneumonia: pneumonia due to Pseudomonas                           |
| 410.30 | Acute Myocardial Infarction (inferoposterior wall) – episode of care unspecified | 404.13 | Benign hypertensive heart and renal disease with heart failure and renal failure | 482.2  | Other bacterial pneumonia: pneumonia due to Hemophilus influenzae (H. influenzae) |
| 410.31 | Acute Myocardial Infarction (inferoposterior wall) – initial episode of care     | 404.91 | Hypertensive heart and renal disease with heart failure                          | 482.30 | Pneumonia due to Streptococcus: Streptococcus, unspecified                        |
| 410.40 | Acute Myocardial Infarction (other inferior wall) – episode of care unspecified  | 404.93 | Hypertensive heart and renal disease with heart failure and renal failure        | 482.31 | Pneumonia due to Streptococcus: Group A                                           |
| 410.41 | Acute Myocardial Infarction (other inferior wall) – initial episode of care      | 428.0  | Congestive heart failure                                                         | 482.32 | Pneumonia due to Streptococcus: Group B                                           |

|        |                                                                                 |       |                            |        |                                                                                  |
|--------|---------------------------------------------------------------------------------|-------|----------------------------|--------|----------------------------------------------------------------------------------|
| 410.50 | Acute Myocardial Infarction (other lateral wall) – episode of care unspecified  | 428.1 | Left heart failure         | 482.39 | Pneumonia due to Streptococcus:<br>Other Streptococcus                           |
| 410.51 | Acute Myocardial Infarction (other lateral wall) – initial episode of care      | 428.9 | Heart failure, unspecified | 482.41 | Pneumonia due to Staphylococcus:<br>Pneumonia due to Staphylococcus, unspecified |
| 410.60 | Acute Myocardial Infarction (true posterior wall) – episode of care unspecified |       |                            | 482.42 | Pneumonia due to Staphylococcus:<br>Pneumonia due to Staphylococcus aureus       |
| 410.61 | Acute Myocardial Infarction (true posterior wall) – initial episode of care     |       |                            | 482.49 | Pneumonia due to Staphylococcus:<br>Other Staphylococcus pneumonia               |
| 410.70 | Acute Myocardial Infarction (subendocardial) – episode of care unspecified      |       |                            | 482.81 | Pneumonia due to other specified bacteria: Anaerobes                             |
| 410.71 | Acute Myocardial Infarction (subendocardial) –                                  |       |                            | 482.82 | Pneumonia due to other specified bacteria:                                       |

|        |                                                                                  |  |  |        |                                                                         |
|--------|----------------------------------------------------------------------------------|--|--|--------|-------------------------------------------------------------------------|
|        | initial episode of care                                                          |  |  |        | Escherichia coli (E. coli)                                              |
| 410.80 | Acute Myocardial Infarction (other specified site) – episode of care unspecified |  |  | 482.83 | Pneumonia due to other specified bacteria: Other gram-negative bacteria |
| 410.81 | Acute Myocardial Infarction (other specified site) – initial episode of care     |  |  | 482.84 | Pneumonia due to other specified bacteria: Legionnaires' disease        |
| 410.90 | Acute Myocardial Infarction (unspecified site) – episode of care unspecified     |  |  | 482.89 | Pneumonia due to other specified bacteria: Other specified bacteria     |
| 410.91 | Acute Myocardial Infarction (unspecified site) – initial episode of care         |  |  | 482.9  | Other bacterial pneumonia: Bacterial pneumonia unspecified              |
|        |                                                                                  |  |  | 483.0  | Pneumonia due to other specified organism: Mycoplasma pneumoniae        |
|        |                                                                                  |  |  | 483.1  | Pneumonia due to                                                        |

|  |  |  |  |       |                                                                              |
|--|--|--|--|-------|------------------------------------------------------------------------------|
|  |  |  |  |       | other specified<br>organism:<br>Chlamydia                                    |
|  |  |  |  | 483.8 | Pneumonia due to<br>other specified<br>organism: Other<br>specified organism |
|  |  |  |  | 485   | Bronchopneumonia,<br>organism<br>unspecified                                 |
|  |  |  |  | 486   | Pneumonia,<br>organism<br>unspecified                                        |
|  |  |  |  | 487.0 | Influenza with<br>pneumonia                                                  |

**Online Supplement Table 2:** Patient demographic characteristics, cardiovascular past medical history, and co-morbid conditions for fee-for-service Medicare beneficiaries admitted for acute myocardial infarction, heart failure, and pneumonia from 2004-2006, stratified by hospital condition-specific volume category.

|                                                | Acute Myocardial Infarction |                 |               |               | Heart Failure |                 |               |               | Pneumonia     |                 |               |               |
|------------------------------------------------|-----------------------------|-----------------|---------------|---------------|---------------|-----------------|---------------|---------------|---------------|-----------------|---------------|---------------|
|                                                | Total Sample                | Hospital Volume |               |               | Total Sample  | Hospital Volume |               |               | Total Sample  | Hospital Volume |               |               |
|                                                |                             | Small           | Medium        | Large         |               | Small           | Medium        | Large         |               | Small           | Medium        | Large         |
| <b>Total No. of Patients</b>                   | 734972                      | 74893           | 159104        | 500975        | 1324287       | 177882          | 319360        | 827045        | 1418252       | 252113          | 367348        | 798791        |
| <b>(%)</b>                                     | (100)                       | (10.2)          | (21.7)        | (68.2)        | (100)         | (13.4)          | (24.1)        | (62.5)        | (100)         | (17.8)          | (25.9)        | (56.3)        |
| <b>Demographics</b>                            |                             |                 |               |               |               |                 |               |               |               |                 |               |               |
| Age: mean (SD)                                 | 79.1<br>(7.9)               | 81.5<br>(8.2)   | 79.8<br>(8.0) | 78.5<br>(7.8) | 80.5<br>(7.9) | 81.6<br>(8.0)   | 80.6<br>(7.9) | 80.2<br>(7.8) | 80.2<br>(8.0) | 80.8<br>(8.2)   | 80.1<br>(8.0) | 80.1<br>(7.9) |
| Female, %                                      | 51.2                        | 56.6            | 53.5          | 49.7          | 50.8          | 60.5            | 59.2          | 57.0          | 55.9          | 55.6            | 56.2          | 55.9          |
| <b>Cardiovascular Past Medical History,* %</b> |                             |                 |               |               |               |                 |               |               |               |                 |               |               |
| History of PCI                                 | 4.7                         | 2.9             | 4.2           | 5.2           | 6.7           | 4.5             | 5.9           | 7.4           | 3.3           | 2.5             | 2.9           | 3.7           |
| History of CABG Surgery*                       | 6.5                         | 7.0             | 7.4           | 6.2           | 11.8          | 8.4             | 11.0          | 12.8          | 5.4           | 4.1             | 5.2           | 5.9           |
| Heart Failure                                  | 30.3                        | 38.2            | 33.9          | 27.9          | 73.1          | 72.1            | 72.4          | 73.6          | 39.1          | 38.7            | 38.7          | 39.5          |
| Myocardial Infarction                          | 15.2                        | 16.2            | 15.7          | 14.9          | 9.6           | 8.1             | 9.4           | 9.9           | 3.7           | 3.2             | 3.6           | 3.9           |
| Anterior MI                                    | 11.2                        | 10.3            | 10.2          | 11.6          | --            | --              | --            | --            | --            | --              | --            | --            |

|                                                      |      |      |      |      |      |      |      |      |      |      |      |      |
|------------------------------------------------------|------|------|------|------|------|------|------|------|------|------|------|------|
| Inferior/Lateral/<br>Posterior MI                    | 14.6 | 11.6 | 12.5 | 15.7 | --   | --   | --   | --   | --   | --   | --   | --   |
| Unstable Angina                                      | 11.6 | 11.0 | 11.9 | 11.6 | 15.2 | 11.9 | 14.5 | 16.1 | 7.2  | 5.9  | 7.0  | 7.8  |
| Chronic<br>Atherosclerosis                           | 73.5 | 58.0 | 68.0 | 77.5 | 71.0 | 63.3 | 69.2 | 73.4 | 46.7 | 42.2 | 45.8 | 48.6 |
| Cardiopulmonary-<br>Respiratory Failure<br>and Shock | 7.3  | 7.5  | 8.3  | 7.0  | 17.5 | 14.7 | 17.1 | 18.3 | 14.4 | 11.8 | 14.1 | 15.4 |
| Valvular Heart<br>Disease                            | 18.5 | 18.1 | 20.1 | 18.1 | 47.0 | 36.8 | 45.1 | 11.0 | --   | --   | --   | --   |
| <b><i>Co-morbid<br/>Condition,* %</i></b>            |      |      |      |      |      |      |      |      |      |      |      |      |
| Hypertension                                         | 59.2 | 57.7 | 59.3 | 59.4 | 82.8 | 81.7 | 82.5 | 83.1 | 75.4 | 73.1 | 75.2 | 76.1 |
| Stroke                                               | 7.0  | 8.4  | 7.9  | 6.5  | 10.6 | 9.3  | 10.3 | 11.0 | 10.9 | 9.7  | 11.0 | 11.3 |
| Cerebrovascular<br>Disease                           | 12.6 | 13.4 | 13.0 | 12.3 | --   | --   | --   | --   | 19.7 | 17.8 | 19.3 | 20.4 |
| Renal Failure                                        | 13.2 | 13.8 | 14.4 | 12.7 | 28.0 | 22.7 | 26.5 | 29.8 | 14.3 | 11.5 | 13.7 | 15.4 |
| COPD                                                 | 28.8 | 30.8 | 30.4 | 28.1 | 47.0 | 46.0 | 47.7 | 46.9 | 56.1 | 53.3 | 56.5 | 56.8 |
| Pneumonia                                            | 12.7 | 17.0 | 14.3 | 11.6 | 38.5 | 40.0 | 38.9 | 38.0 | 41.9 | 40.3 | 41.8 | 42.5 |
| Diabetes                                             | 39.5 | 40.9 | 41.0 | 38.8 | 48.7 | 46.4 | 48.5 | 49.2 | --   | --   | --   | --   |

|                                     |      |      |      |      |      |      |      |      |      |      |      |      |
|-------------------------------------|------|------|------|------|------|------|------|------|------|------|------|------|
| Protein-Calorie Malnutrition        | 3.5  | 3.8  | 3.8  | 3.3  | 5.2  | 4.3  | 5.1  | 5.6  | 8.2  | 6.4  | 8.2  | 8.7  |
| Dementia                            | 14.5 | 20.9 | 17.0 | 12.8 | 20.2 | 21.1 | 20.6 | 19.9 | 27.6 | 27.1 | 28.0 | 27.5 |
| Functional Disability               | 4.8  | 6.0  | 5.4  | 4.4  | 6.8  | 6.6  | 6.8  | 6.9  | 7.6  | 7.3  | 7.8  | 7.6  |
| Peripheral Vascular Disease         | 20.6 | 20.1 | 21.9 | 20.3 | 32.1 | 26.4 | 30.3 | 34.0 | 26.0 | 22.1 | 25.2 | 27.6 |
| Metastatic Cancer                   | 3.5  | 3.5  | 3.7  | 3.5  | 4.0  | 3.3  | 3.8  | 4.3  | 7.9  | 6.1  | 7.5  | 8.7  |
| Trauma in Last Year                 | 22.3 | 25.9 | 24.1 | 21.2 | 34.1 | 34.9 | 34.4 | 33.8 | 34.7 | 34.5 | 34.6 | 34.8 |
| Major Psychiatric Disorders         | 5.5  | 7.2  | 6.3  | 5.0  | 8.6  | 9.1  | 8.6  | 8.5  | 11.3 | 11.1 | 11.3 | 11.3 |
| Chronic Liver Disease               | 0.9  | 0.8  | 1.0  | 0.9  | 1.9  | 1.5  | 1.9  | 2.0  | 1.4  | 1.1  | 1.4  | 1.5  |
| Severe Hematological Disorder       | --   | --   | --   | --   | --   | --   | --   | --   | 3.5  | 2.5  | 3.3  | 3.9  |
| Iron Deficiency                     | --   | --   | --   | --   | --   | --   | --   | --   | 43.6 | 41.1 | 43.1 | 44.5 |
| Depression                          | --   | --   | --   | --   | --   | --   | --   | --   | 15.8 | 16.2 | 15.8 | 15.7 |
| Parkinson's or Huntington's Disease | --   | --   | --   | --   | --   | --   | --   | --   | 4.3  | 4.3  | 4.3  | 4.2  |
| Seizure Disorders or                | --   | --   | --   | --   | --   | --   | --   | --   | 5.8  | 5.1  | 5.8  | 6.0  |

|                                                        |    |    |    |    |    |    |    |    |      |      |      |      |
|--------------------------------------------------------|----|----|----|----|----|----|----|----|------|------|------|------|
| Convulsions                                            |    |    |    |    |    |    |    |    |      |      |      |      |
| Fibrosis of Lung or<br>Other Chronic Lung<br>Disorders | -- | -- | -- | -- | -- | -- | -- | -- | 16.7 | 13.4 | 16.5 | 17.8 |
| Asthma                                                 | -- | -- | -- | -- | -- | -- | -- | -- | 11.3 | 10.6 | 11.3 | 11.5 |
| Vertebral Fractures                                    | -- | -- | -- | -- | -- | -- | -- | -- | 4.9  | 4.5  | 4.8  | 5.0  |

Notes: AMI = Acute Myocardial Infarction; PCI = Percutaneous Coronary Intervention; CABG = Coronary Artery Bypass Graft; COPD = Chronic Obstructive

Pulmonary Disease; -- = clinical characteristic not used for risk-standardization for that condition-specific hospitalization. Risk-adjustment models included age, sex, and the same clinical characteristic variables used for the risk-standardization measures developed for each condition independently for the Centers for Medicare & Medicaid Services and endorsed by the National Quality Forum (NQF) for hospital performance evaluation.<sup>11, 12</sup> The AMI model includes 10 cardiovascular clinical characteristics and 15 other co-morbid conditions, the HF model includes 8 and 14, and the pneumonia model includes 7 and 22.

\* Cardiovascular past medical history and co-morbid conditions were based on hierarchical condition categories, with the exception of history of PTCA and CABG surgery and anterior and inferior/lateral/posterior MI.
